# Supplementary material for: The domesticated transposase ALP2 mediates formation of a novel Polycomb protein complex by direct interaction with MSI1, a core subunit of Polycomb Repressive Complex 2 (PRC2)
Source: PLOS journal article supplement (doi:10.1371/journal.pgen.1008681), 2020-05-28
Supplement: S10 (10.1371/journal.pgen.1008681.s010) [file journal.pgen.1008681.s010]

A

| Chromosome | Position | Mutation | No reads | Concordance | Score | Annotation | Gene      | Protein position | Type   | Amino acid change |
|------------|----------|----------|----------|-------------|-------|------------|-----------|------------------|--------|-------------------|
| 5          | 8368077  | C->T     | 51       | 0.96        | 40    | CDS        | AT5G24500 | 213              | Nonsyn | W->*              |
| 5          | 8774239  | C->T     | 50       | 0.98        | 40    | CDS        | AT5G25280 | 120              | Nonsyn | P->S              |
| 5          | 10761168 | C->T     | 50       | 0.86        | 36    | intergenic | -         | -                | -      | -                 |
| 5          | 14126583 | C->T     | 31       | 0.84        | 36    | intergenic | -         | -                | -      | -                 |

B

| Chromosome | Position | SNP | Coverage | Ref C (%) | SNP T (%) | other (%) |
|------------|----------|-----|----------|-----------|-----------|-----------|
| 5          | 8368077  | T   | 12702    | 1.48      | 98.52     | 0         |
| 5          | 8774239  | T   | 61078    | 3.193     | 96.804    | 0.003     |

**S1 Table. Identification of *ALP2* candidate genes by sequencing.** A. Annotation of high scoring mutations from fast isogenic mapping identified two candidate genes (Hartwig et al. 2012). Score indicates Shore quality score ranged from 1 (low) to 40 (high). Protein position indicates amino acid number in translated coding sequence. B. Allele frequency at the two candidate mutations reveals high frequency of the mutant allele in DNA from bulked mutant plants.
